# Supplementary material
Source: HighWire-hosted journal article supplement (http://qhc.bmj.com/highwire/filestream/147482/field_highwire_adjunct_files/1/bmjqs-2014-003555supp_appendix2.pdf)
Supplement: bmjqs-2014-003555supp_appendix2.pdf [file bmjqs-2014-003555supp_appendix2.pdf]

Appendix 2. **BRIGHAM and WOMENS NSPF MEDMARX CPOE ERRORS PROJECT - CPOE ERRORS TAXONOMY**

**WHAT Happened**

**Patient**

- Meds ordered for wrong patient
  - Meds ordered on wrong patient account
- Meds labeled for wrong patient
- Meds administered to wrong patient
  - Same or similar patient names

**Drug**

- Omitted drug
- Drug not available in TPN template
- Missing drug form
- Ordered wrong drug
  - Look alike sound alike drug
- Correct drug ordered/wrong drug processed
- Ordered wrong formulation/dosage form
  - Ordered wrong PO formulation (ER, XR, etc.)
  - NDC Mismatch/wrong package size
- Ordered wrong diluents (IV)
- Allergy
  - Prescribed drug to white patient was allergic
  - No Allergy Assessment
- Contraindicated
- Duplicate Order
  - Same exact drug
  - Same drug different routes
- Duplicate Therapy
  - Different drug same class
- Ordered a drug that was non-formulary
- Ordered a drug that was restricted
- Ordered a drug that was out of stock/drug shortage
- Ordered for a home medication
- Non-existent medication

**Dose**

- Ordered wrong dose or strength
  - Incorrect units used
- Correct dose ordered/incorrect dose processed
- Dose range order
- Wrong concentration/volume
- Unavailable dose ordered
  - Combinatory issues
  - Dose modification issue
- Missing number/quantity or wrong number ordered

- Missing dose on Rx
- Under dose or potential under dose
- Patient missed dose
- Potential for missed dose(s)
- Dose lower than ordered
- Overdose or potential overdose
- Patient given extra dose
- Patient potential for extra dose
- Dose higher than recommended
- Prolonged infusion (e.g. extra dose for IV infusion)

#### Route

- Missing route
- Ordered wrong route for patient
- Route-formulation mismatch
- IV/PO issue

#### Time

- Missing time/schedule information
- No start date entered
- No stop date entered
- Wrong time selected
- Wrong schedule entered
- Correct schedule entered/incorrect schedule processed
- Wrong order date
- AM/PM Mix-up
- Date/time mismatch
- Frequency range order
- Patient received delayed dose
- Drug product expires before infusion finished
- Drug product expires before prescribed amount finished
- Confusion related to initial start time and continuation
- ED order issues – scheduled vs. once or future
- Wrong administration rate
- No administration rate
- Refill information missing or erroneous

#### Miscellaneous

- Unable to enter desired order
- Staff workload increase and/or order not processed or delayed
  - Order missed
  - Data loss
  - Order entered prior to admission
  - Order wasn't renewed
  - Order not verified
  - Order was held
  - Hold order mismatched
  - Order was confusing: Order needed to be clarified
  - Order was confusion: Missing info/incomplete order

Order was confusing: Comments field has conflicting information

- Routing issue
- Missing or incorrect SIG/patient instructions
- Nursing process/administration issues
- Erroneous alert
- Ordered wrong template /order set
- Discontinuation issues
- Verbal/Telephonic issues
- Corollary order issues
- IV flush issues
- Controlled substance issues
- No valid order
- Administration/order label mismatch
- Monitoring
  - Order mismatch
  - Failure to act on critical lab
  - Inadequate monitoring
- Order entered under incorrect MD
- Ordered wrong non-drug product
- Electronic order correct; hard copy ordered incorrectly

## WHY it Happened

### CPOE – Order Entry Issues

- System interface/usability/visual display issues
  - Pull-down menu issues
  - SALA/LASA issues
  - Instructions/meds in comment field were not seen
  - Comments field or free text confusing/confusion
  - Use of system or SIG abbreviations
  - Computer dosing calculation issues
  - Weight information not available/inaccurate
  - Initial vs. continuing order issues
  - Discontinuation order issues
  - Hold orders
  - Order/reorder modification issues
  - Lack of transparency in duration/renewal status
  - CDS failure/problem
  - Order set/template/protocol issues
  - Issues with favorites
  - Patient information on screen after order was filed
  - Visual display confusing or inadequate
  - Transcription (copy/paste)
- System limitations/inadequacy
  - Drug formulary issues
  - Build issues—route/drug not in CPOE
  - Drug dictionary miscode/out-of-date drug information
  - Inadequate field length
  - Inability/problems in titrating/tapering
  - Inability to enter alternate day dosing
  - Error in default dose or schedule
  - Default SIG or other default issues
  - Scheduled drug routing issue
  - Pharmacy routing issue
  - Corollary orders: timing to properly linked
  - Routing/mapping issue
- Drug allergy issues
  - Drug ordered as text, unable to check for allergy in text
  - Failure to alert
  - Drug allergy field limit
  - Drug allergy incomplete/unclear/conflicting

### Computer System Issues

- Computer down/outage
- Hybrid system (electronic & paper)
- eMAR/MAR issues
- Multiple systems (2 or more electronic systems)
- Pharmacy order entry problems/issues

Profiling issues—failure to perform or do correctly  
TPN issues

#### Transition Issues

Medication reconciliation issue  
Home medication issue  
Patient transferred (within hospital)  
Patient discharged (out of hospital)  
Transferred from outside hospital

#### User Issues

Communication issues  
2 different clinicians entered  
Misinterpretation of order(s)  
Lack of computer training/system knowledge  
Inexperienced end user  
Failure to verify patient identification  
Failure to follow established procedures or protocol  
Lack of protocol knowledge  
Calculation error  
Lack of clinical knowledge  
Alert ignored/overridden  
Typing error  
Nursing administration

#### Miscellaneous/Patient Issues

#### Insurance Issues

#### Patient Access Issues

#### Inaccurate/Inadequate Patient Drug Knowledge

#### Administrative Issue/Delay

**Possible PREVENTION Strategies****Clinical Decision Support (CDS) Enhancements****Ordering facilitators/alerts****ALLERGY**

- Drug allergy checking (including class)
- Standardized SIGs

**DUPLICATE**

- Duplicate order checking/support
- Duplicate therapy checking/support

**DOSING SUPPORT**

- Dose availability checking
- Default dosing selections
- Dose range checking
  - Individual dosing calculations
- Auto-calculations for combinatory and other complex dosing regimens
- Dose conversion support
- Titration/dose change – better system for entering/conveying
- Scheduling feedback

**DURATION SUPPORT**

- Drug duration support
  - Drug expiration support
- Reminders about automatic stop dates/need for re-order drug

**route/mix/diluent****DDI**

- Drug-drug interaction checking

**COMPATIBILITY**

- Route formulation checking (eye drops, ear)
- Patient access route guidance
- IV mix support (IV compatibility, how to mix)
- Enhanced ability to modify orders and regimens (tapers)
- Auto calculation for prescription quantities
- System for reconciling new/now with continuing dosing

**FORMULARY**

- Formulary status and restrictions warnings
- Alerts for non-formulary medications
- Generic substitution

**DRUG LAB**

- Drug-laboratory linking checking
- Automatic corollary lab orders

**DRUG DISEASE STATE**

- Drug-disease alerting

Pregnancy alerting

#### MISCELLANEOUS WORK FLOW DESIGN FACILITATORS

- Order set support
- Protocol support
- Automatic corollary products/supplies
- Blank field checking

#### Alert Tiering Enhancements

- Hard stops
- Tiered alerts with hard stops when necessary

#### Management Support (Policies/Infrastructure/Standards)

- Order set QA testing/updates
- Standardize product formulation naming
- Standardized constructs for dosing regimens
- Standardized constructs for dose form-route
- Comment field display
- Communication related to hold orders
- Systems integration
- Electronic transmission of Rx
- Remove option to e-scribe federally controlled substances
- Staff authorization issues
- Improved downtime procedures
- Improved patient registration workflow/logistics
- Operationalize TPN and IV queues
- Tie into internal scheduling
- Direct order entry: Verbal/Telephonic issues
- Medication handoff/transfer standardization

#### Enhanced Education/Training

- Standardized SIGs
- Standardized weights (only in kilograms)
- Enhanced allergy entry for drugs not included in allergy list

#### Improved Design/Functionality

- Reminders for Staff
- Facilitation of products selection by pharmacists instead of MD
- Unlimited number of medication allergies
- Include a picture of the patient on the ordering screen
- Indication on prescription
- Include time in pick list (actual time)
- Patient location support
- Patient route access availability: IV access NPO
- Provide links to clinical references
- Tallman lettering
- Order set/sentences for complex tapers
- Order set/sentences for range orders
- Weight-based dosing

Medication reconciliation support

[Other CPOE & System Enhancements](#)

Indication on prescription (standardized SIG)

Mapping standards

Direct order entry: Verbal/Telephonic issues

Direct order entry and transmission of controlled substances

DEA direct order entry

[Drug Database Improvements/Enhancements](#)

[Other Pharmacist Interventions](#)
